# Supplementary material for: Luminescent biomimetic citrate-coated europium-doped carbonated apatite nanoparticles for use in bioimaging: physico-chemistry and cytocompatibility
Source: PubMed Central journal article supplement — RSC Adv. 2018 Jan 10;8(5):2385–97. doi: 10.1039/c7ra12536d (PMC9077401; doi:10.1039/c7ra12536d), 2018-01-10
Supplement: RA-008-C7RA12536D-s001.pdf [file RA-008-C7RA12536D-s001.pdf]

## Electronic Supplementary Information

### Luminescent biomimetic citrate-coated europium-doped carbonated apatite particles for use in bioimaging: physico-chemistry and cytocompatibility

Jaime Gómez-Morales<sup>1,\*</sup>, Cristóbal Verdugo-Escamilla<sup>1</sup>, Raquel Fernández-Penas<sup>1</sup>, Carmen María Parra-Milla<sup>1</sup>, Christophe Drouet<sup>2</sup>, Françoise Bosc<sup>2</sup>, Francesca Oltolina<sup>3</sup>, Maria Prat<sup>3</sup>, Jorge Fernando Fernández-Sánchez<sup>4</sup>

<sup>1</sup>Laboratorio de Estudios Cristalográficos. IACT (CSIC-UGR). Avda. Las Palmeras, nº 4. E-18100 Armilla (Granada), Spain. E-mail: [jaime@lec.csic.es](mailto:jaime@lec.csic.es)

<sup>2</sup> CIRIMAT, Université de Toulouse, UMR CNRS/INPT/UPS 5085, Ensiacet, 4 allée Emile Monso, 31030 Toulouse cedex 4, France.

<sup>3</sup>Dipartimento di Scienze della Salute, Università del Piemonte Orientale, Via Solaroli, 17, 28100 Novara, Italy.

<sup>4</sup>Department of Analytical Chemistry, Faculty of Sciences, University of Granada, Avda. Fuentenueva s/n, 18071 Granada, Spain.

\*Corresponding author: [jaime@lec.csic.es](mailto:jaime@lec.csic.es)

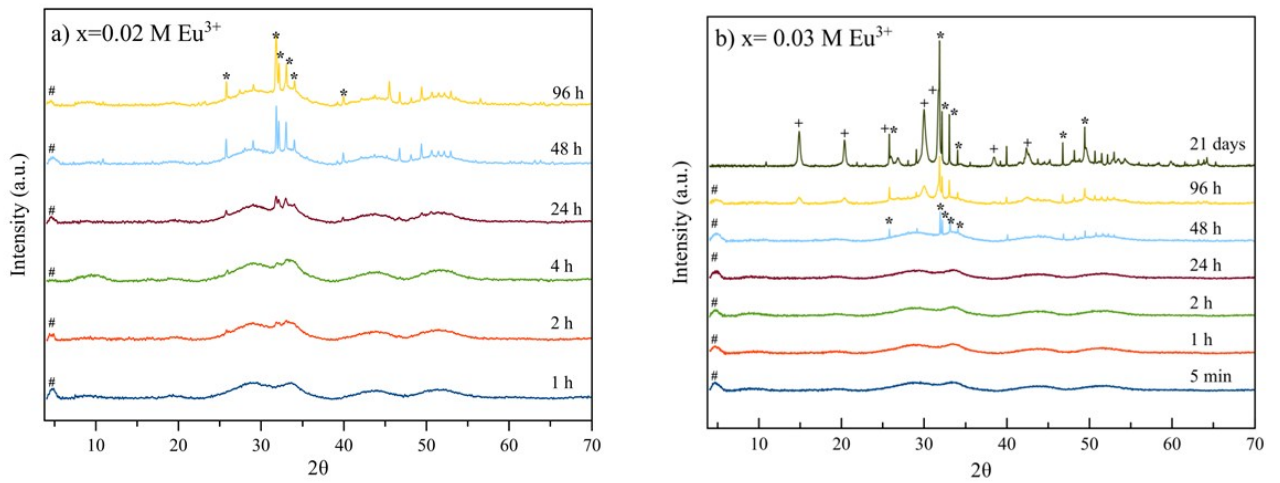

Figure S11. XRD patterns of samples precipitated at different maturation times in the presence of a)  $x=0.02 \text{ M Eu}^{3+}$  and b)  $x = 0.03 \text{ M Eu}^{3+}$ . # (OCP, 100, PDF 44-0778), \*(apatite phase, PDF 01-1008), +( $\text{EuPO}_4 \cdot \text{H}_2\text{O}$  phase, PDF 20 1044)

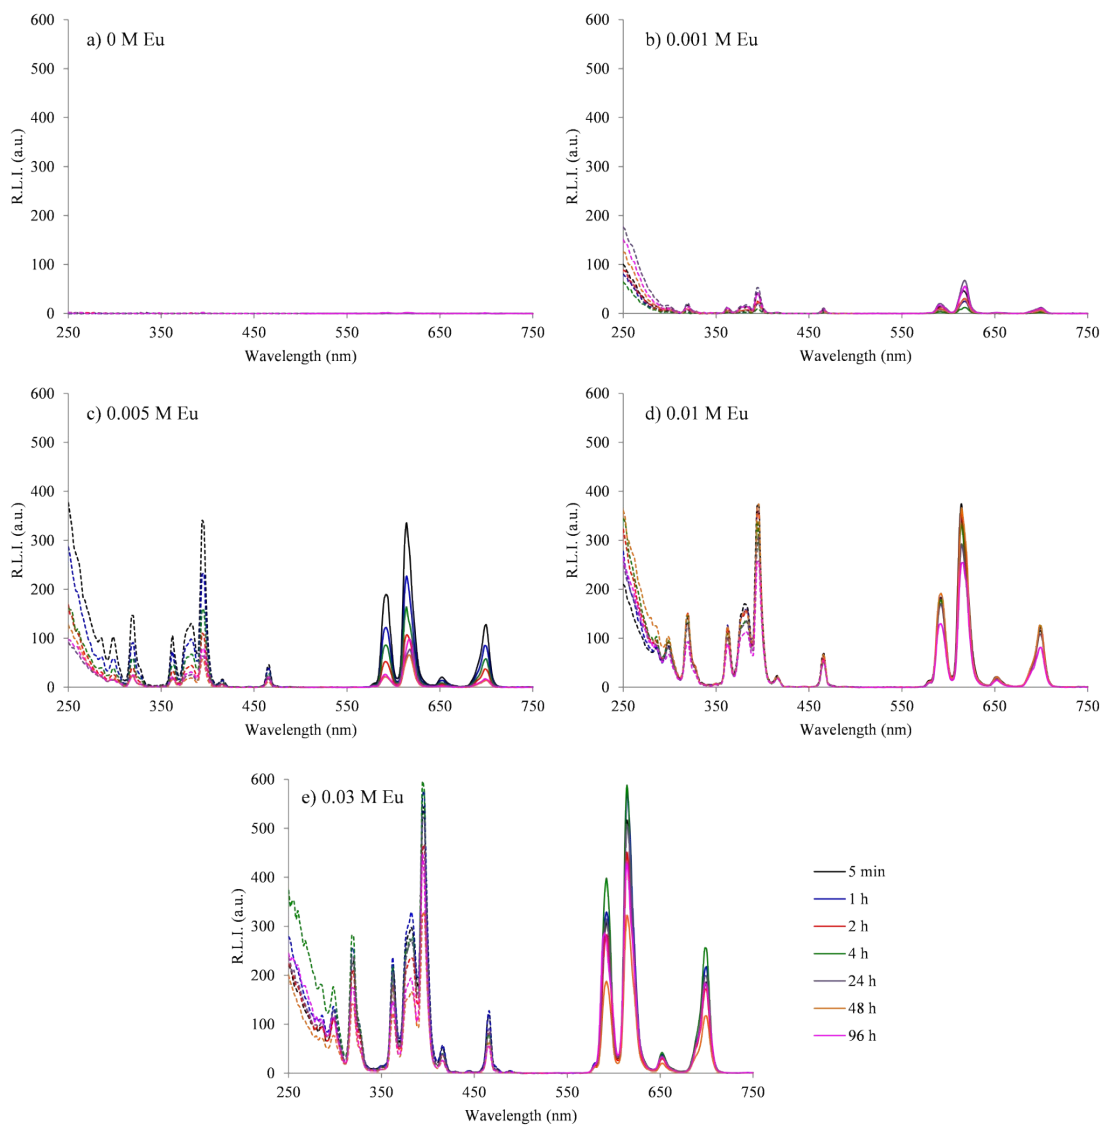

Figure S12. Excitation (dashed line) and emission (solid line) spectra of Eu<sup>3+</sup>-cit-cAp prepared with different Eu<sup>3+</sup> doping concentration at precipitation times of 5 min, 1h, 2h, 4h, 24h, 48h and 96h.

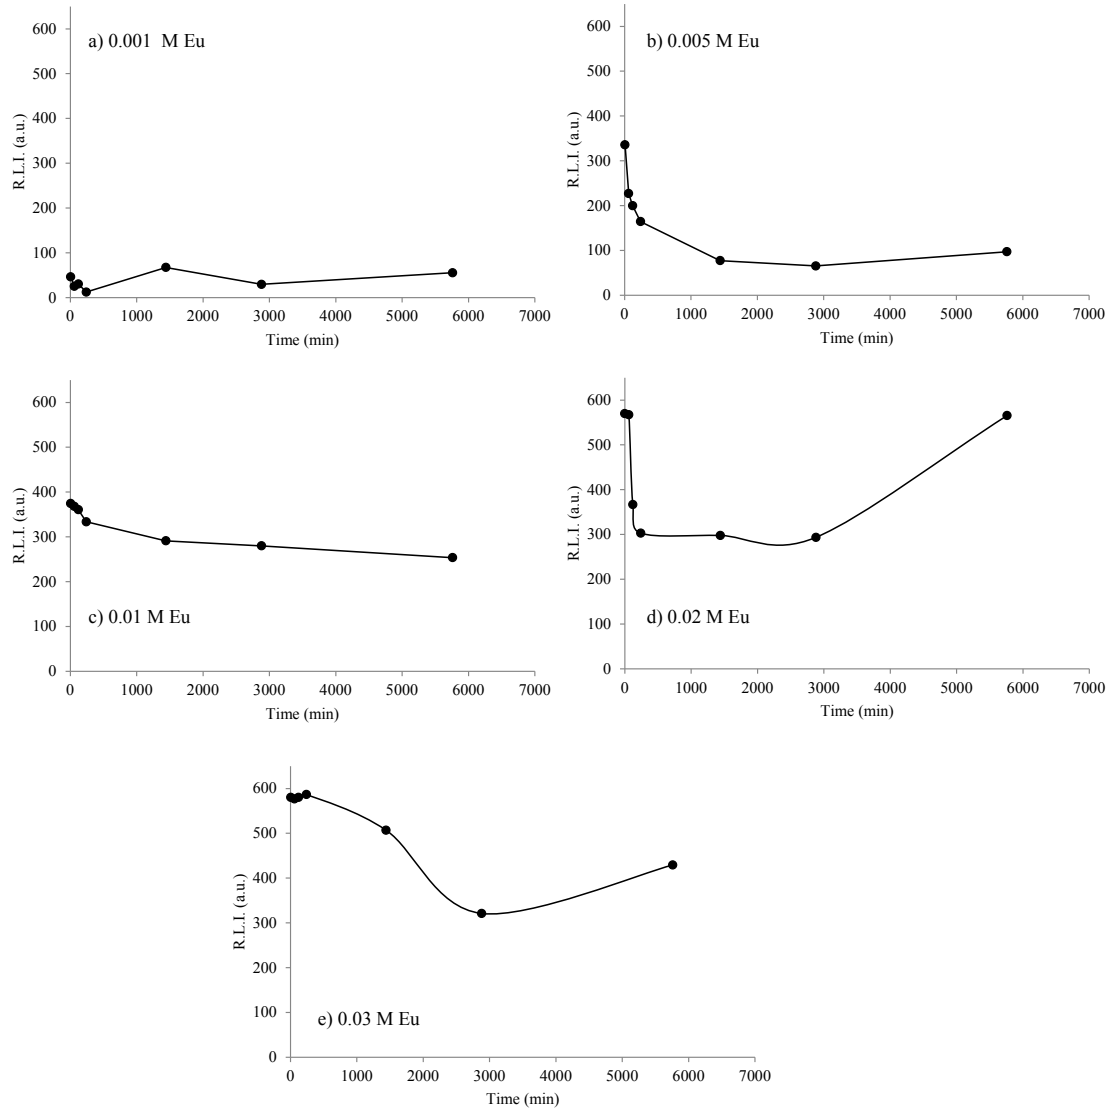

Figure SI3. Effect of the precipitation time over the R.L.I. of the different  $\text{Eu}^{3+}$  doping concentrations.  $\lambda_{\text{exc/em}} = 394/614$  nm, slit-widths $_{\text{exc/em}} = 5/5$  nm,  $t_d = 0.120$   $\mu\text{s}$ ,  $t_g = 5$  ms and detector voltage = 500 v.

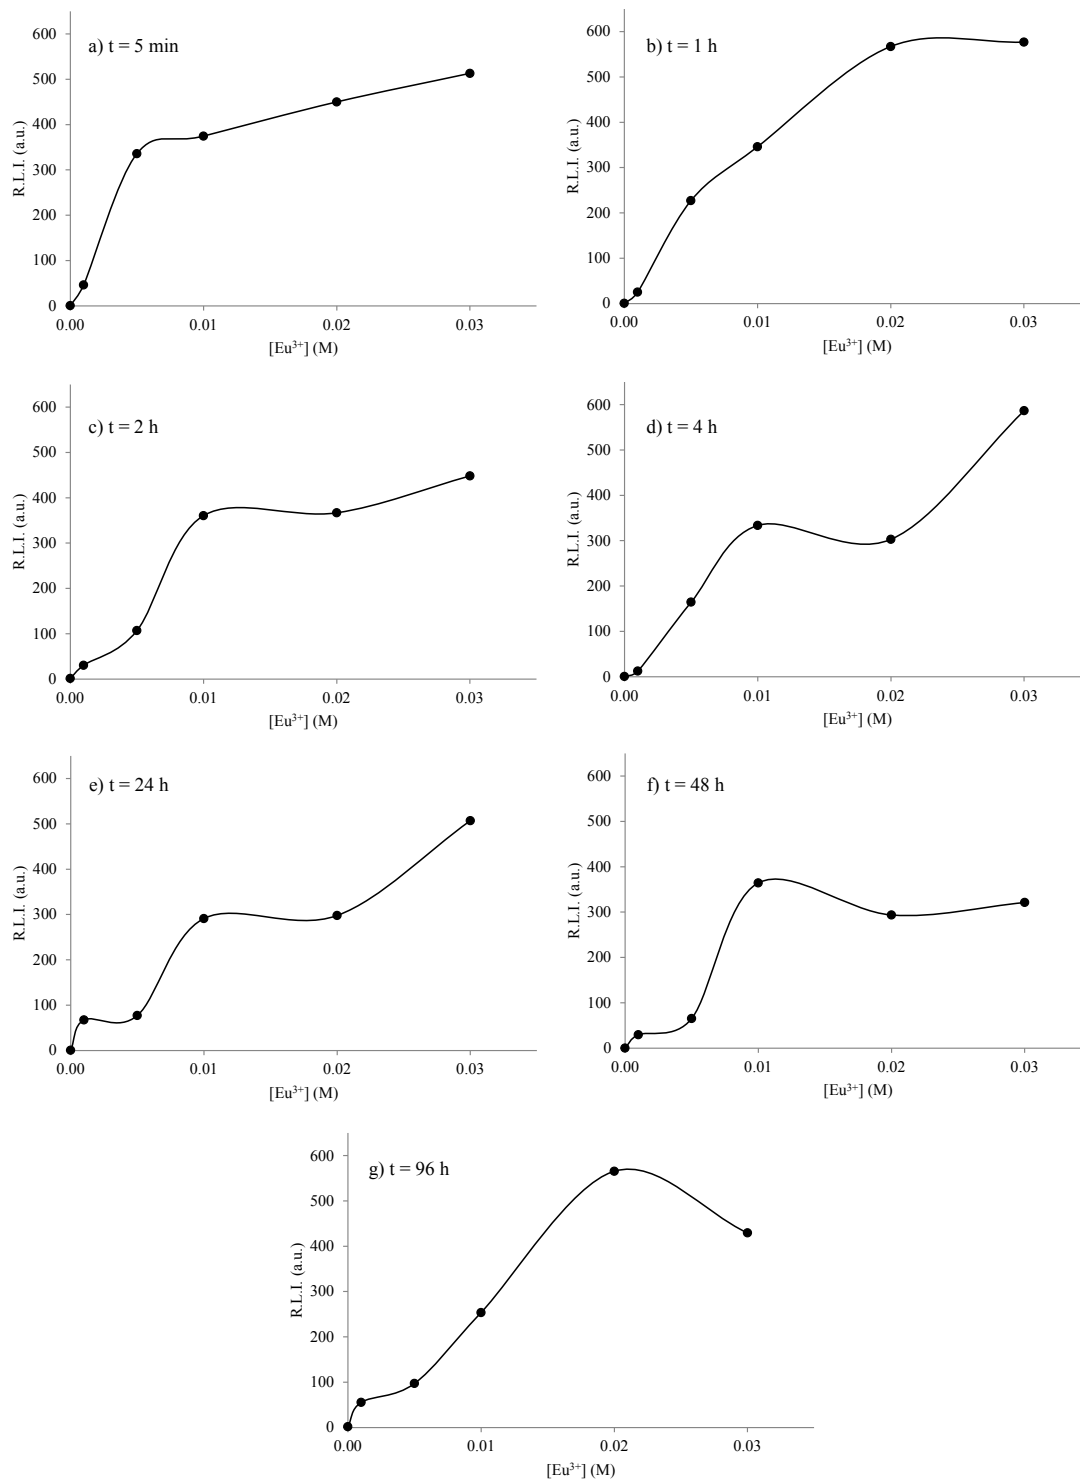

Figure SI4. Effect of the  $\text{Eu}^{3+}$  doping concentration over the R.L.I. of the different materials precipitated at different times.  $\lambda_{\text{exc/em}} = 394/614$  nm, slit-widths $_{\text{exc/em}} = 5/5$  nm,  $t_d = 0.120$   $\mu\text{s}$ ,  $t_g = 5$  ms and detector voltage = 500 v.

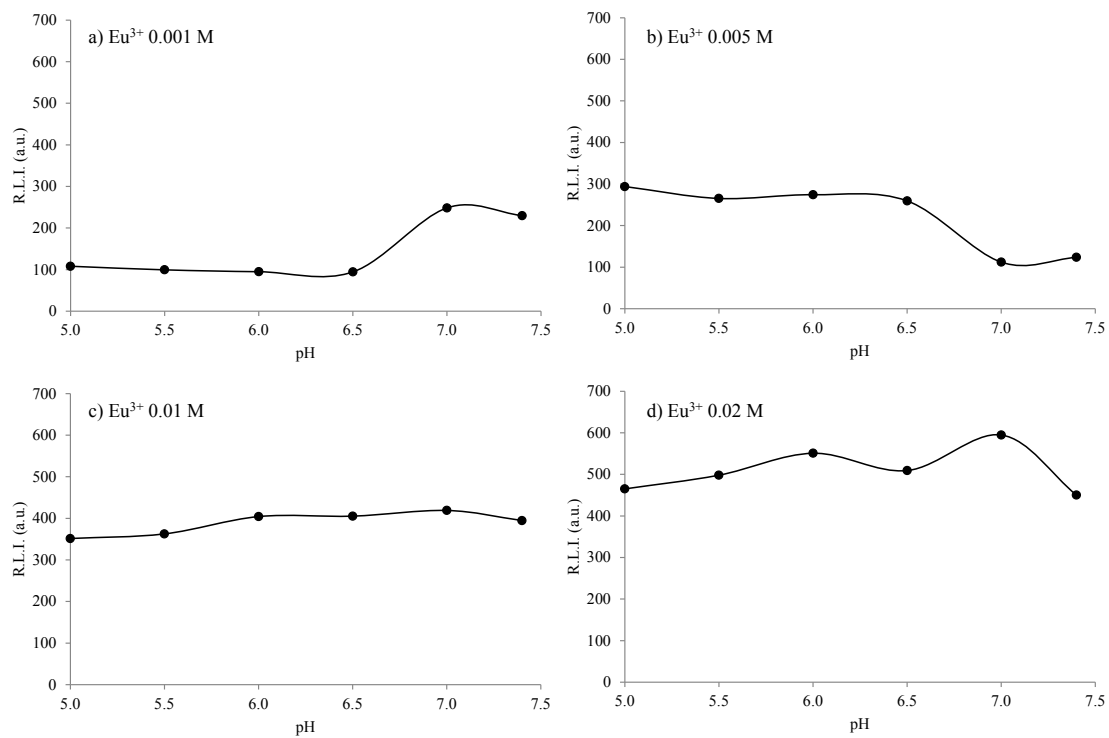

Figure SI5. Effect of the pH on the luminescence of the different  $\text{Eu}^{3+}$  doping concentrations dispersed in aqueous solution at 25°C.  $\lambda_{\text{exc/em}} = 232/616$  nm, slit-widths $_{\text{exc/em}} = 10/10$  nm,  $t_d = 0.120\mu\text{s}$ ,  $t_g = 5$  ms and detector voltage = 600 v.

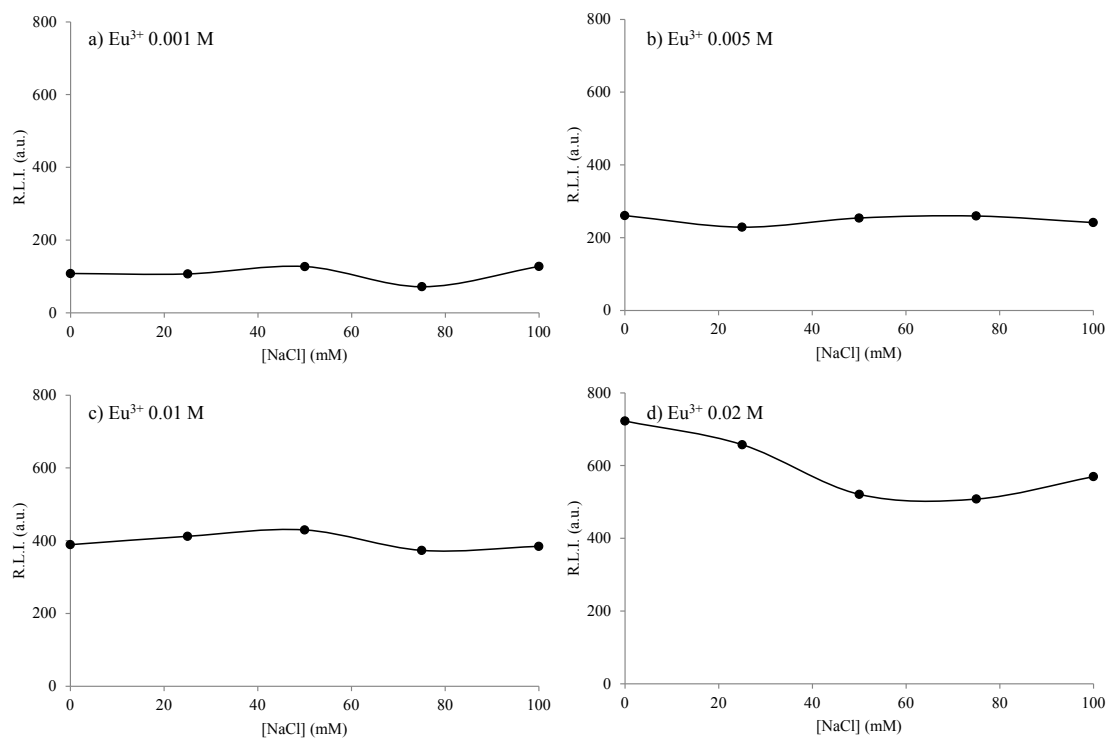

Figure SI6. Effect of the ionic strength on the luminescence of the different Eu<sup>3+</sup> doping concentrations dispersed in aqueous solution at pH=7.0 and 25°C.  $\lambda_{\text{exc/em}} = 232/616$  nm, slit-widths<sub>exc/em</sub> = 10/10 nm,  $t_d = 0.120$   $\mu$ s,  $t_g = 5$  ms and detector voltage = 600 v.

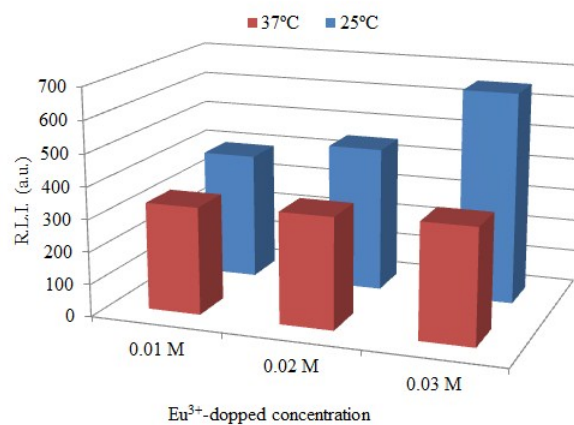

Figure SI7. Effect of the temperature on the luminescence of the different Eu<sup>3+</sup> doping concentrations dispersed in aqueous solution at pH=7.0.  $\lambda_{\text{exc/em}} = 232/616$  nm, slit-widths<sub>exc/em</sub> = 10/10 nm,  $t_d = 0.120\mu\text{s}$ ,  $t_g = 5$  ms and detector voltage = 600 v.
